# Supplementary material
Source: PubMed Central journal article supplement (PMC3807477)
Supplement: JB.02263-12_zjb999092822so1.pdf [file JB.02263-12_zjb999092822so1.pdf]

1  
2 **TraG encoded by the pIP501 type IV secretion system is a two domain peptidoglycan**  
3 **degrading enzyme essential for conjugative transfer**

4  
5 Karsten Arends<sup>1†</sup>, Ertugrul-Kaan Celik<sup>1,2\*</sup>, Ines Probst<sup>3</sup>, Nikolaus Goessweiner-Mohr<sup>2</sup>,  
6 Christian Fercher<sup>2</sup>, Lukas Grumet<sup>2</sup>, Cem Soellue<sup>1,2</sup>, Mohammad Yaser Abajy<sup>1,2</sup>, Tuerkan  
7 Sakinc<sup>4</sup>, Melanie Broszat<sup>3,4</sup>, Katarzyna Schiwon<sup>1</sup>, Guenther Koraimann<sup>2</sup>, Walter Keller<sup>2</sup>, and  
8 Elisabeth Grohmann<sup>1,3,4#</sup>

9  
10  
11 <sup>1</sup> Department of Environmental Microbiology/Genetics, University of Technology Berlin,  
12 10587 Berlin, Germany

13 <sup>2</sup> Institute of Molecular Biosciences, University of Graz, 8010 Graz, Austria

14 <sup>3</sup> Faculty of Biology, Microbiology, Albert-Ludwigs-University Freiburg, 79104 Freiburg,  
15 Germany

16 <sup>4</sup> Division of Infectious Diseases, University Medical Centre Freiburg, 79106 Freiburg,  
17 Germany

18  
19 # Corresponding author. Mailing address: Division of Infectious Diseases, University  
20 Medical Centre Freiburg, Hugstetter Strasse 55, D-79106 Freiburg, Germany. Phone: +49  
21 76127082520. Fax: +49 76127018200. E-mail: elisabeth.grohmann@uniklinik-freiburg.de

22 † Present address: Robert Koch-Institute, DGZ-Ring 1, D-13086 Berlin, Germany.

23 \* KA and E-K C equally contributed to the work.

24  
25 Running Title: Gram positive T4S protein TraG

26

## 27 **Supplemental Methods**

28

29 **DNA preparation and transformation.** Extraction and purification of plasmid DNA from *E.*  
30 *coli* was performed using QIAprep spin miniprep kit (Qiagen). Restriction endonucleases  
31 were purchased from Promega and New England Biolabs. T4 DNA ligase and shrimp alkaline  
32 phosphatase were from Roche Diagnostics. GenTherm DNA polymerase was purchased from  
33 Rapidozym (Berlin, Germany), *Phusion* high-fidelity DNA polymerase from Finnzymes,  
34 *Precissor* High-fidelity DNA polymerase from BioCat (Heidelberg, Germany) and Taq DNA  
35 polymerase was from Genscript (Scotch Plains, NJ). The enzymes were used as specified by  
36 the suppliers.

37 Synthetic oligonucleotides were purchased from Sigma-Aldrich. PCR fragments for cloning  
38 experiments were purified by Wizard SV gel and PCR Clean-Up system (Promega).  
39 Preparation of competent cells and *E. coli* transformations with plasmid DNA were performed  
40 by standard methods.

41

42 **Cloning of *traG*ΔTMH and *traG* domains.** *traG*ΔTMH (the first 45 amino acids of *traG*  
43 containing a putative transmembrane helix (TMH) were deleted), *slt*<sub>TraG</sub> and *chap*<sub>TraG</sub> were  
44 amplified by PCR using the primers listed in Table S1. The respective EcoRI/SalI DNA  
45 fragments were inserted into EcoRI/SalI cut pMAL-c2X expression plasmid. The nucleotide  
46 sequences of the insertions were verified by sequencing at SMB (Rüdersdorf, Germany).

47

48 **Site-directed mutagenesis of the SLT domain.** Site-directed mutagenesis was performed by  
49 PCR overlap extensions (1). Briefly, two PCR products were generated with primer pairs  
50 *traG*\_E87G-fw/*traG*-SalI-rev and *traG*-EcoRI-fw/*traG*\_E87G-rev thus exchanging the  
51 putative catalytic glutamate at TraG position 87 (Acc. No. CAD44387) for glycine, thereby  
52 introducing a BamHI site without further amino acid exchanges. The PCR products were

53 annealed and used as template in a PCR with primer pair *traGΔtmh-EcoRI-fw/slt-SalI-rev*.  
54 The PCR product was inserted into EcoRI/SalI cut pMAL-c2x, the nucleotide exchanges were  
55 verified by BamHI-restriction and sequencing.

56

57 **Expression of fusion proteins.** *E. coli* XL10 and *E. coli* BL21-CodonPlus(DE3)-RIL  
58 harboring the recombinant expression plasmids were grown in 200 ml LB broth supplemented  
59 with 100 µg/ml Ap and 50 µg/ml Cm at 37°C to OD<sub>600</sub> of 0.6 (MBP-TraGΔTMH, 78.5 kDa;  
60 MBP-SLT<sub>TraG</sub>, 57.3 kDa, MBP-CHAP<sub>TraG</sub>, 64 kDa). For simplicity the MBP fusion proteins  
61 are referred to as TraGΔTMH, SLT<sub>TraG</sub>, SLT(E87G)<sub>TraG</sub> and CHAP<sub>TraG</sub>, respectively, in the  
62 text. Protein expression was induced by the addition of isopropyl-β-D-thiogalactopyranoside  
63 (IPTG) (0.5 mM) and stopped after 3 hours due to the cell toxicity of the TraG protein. The *E.*  
64 *coli* cells were pelleted and re-suspended in 10 ml buffer A [100 mM K<sub>2</sub>HPO<sub>4</sub>/KH<sub>2</sub>PO<sub>4</sub>, 50  
65 mM (NH<sub>4</sub>)<sub>2</sub>SO<sub>4</sub>, 0.5 % Triton X-100 (pH 7.6)]. 1 mM PMSF, 1mM benzamidin and 10 µl  
66 protease inhibitor mix (Roche Diagnostics) were added.

67

68 **Purification of MBP-tagged proteins.** MBP-TraGΔTMH, MBP-SLT, MBP-SLT(E87G) and  
69 MBP-CHAP were purified in one step by affinity chromatography with 1 ml MBP Trap  
70 columns (GE Healthcare) equilibrated with buffer A. The column was washed with buffer A  
71 containing 0.05 mM maltose and the proteins were eluted with buffer A containing 10 mM  
72 maltose. Protein fractions of high purity were pooled, dialyzed against buffer A to remove the  
73 maltose and concentrated by Amicon CentriPrep columns (molar mass cutoff < 30 kDa,  
74 Millipore) and applied to the biochemical assays. MBP used as negative control in the assays  
75 was purified following the same protocol. Rabbit polyclonal anti-TraG antibodies were  
76 produced by BioGenes (Berlin, Germany) with purified TraGΔTMH protein according to  
77 standardized protocols.

78

79 **PG isolation and purification from *E. faecalis*** according to Leclerc et al. (1989) (2) with  
80 some modifications: *E. faecalis* JH2-2 was grown in 1 l Todd-Hewitt broth (THB)  
81 supplemented with 25 µg/ml Rif to OD<sub>600</sub> = 0.4. The cells were harvested at 7000 × g, 4°C for  
82 15 min and washed with 80 ml 25 mM Tris/HCl buffer (pH 8.0). The pellet was vacuum-dried  
83 and suspended in 80 ml 4% SDS. The suspension was shaken at 150 rpm at room temperature  
84 for 90 min and sonicated (Branson Sonifier 250, Microtip, 40% output, level 8, 2 sec pulse, 8  
85 sec pause) for 5 min. The extract was boiled for 15 min at 100°C and centrifuged at 12000 × g  
86 for 15 min. The pellet was re-suspended in 0.1% Triton X-100 (v/v) and incubated for 30 min  
87 at room temperature. The suspension was centrifuged as before, the pellet was washed four  
88 times with 80 ml distilled water, PG was lyophilized and stored at -80°C.

89 Furthermore, to exclude cross-contamination of the PG preparation with PG degrading  
90 enzymes bound to the PG, PG from *E. faecalis* JH2-2 was purified following the protocol of  
91 Eckert et al. (2006) (3) with some modifications: *E. faecalis* JH2-2 was grown in 2 l Brain  
92 Heart Infusion broth (BHI) (Oxoid) supplemented with 25 µg/ml Rif to OD<sub>650</sub> = 0.7. The cells  
93 were harvested at 12 000 × g, 20°C for 10 min. PG was extracted by treating the bacterial  
94 pellet with 56 ml 4% SDS in a water-bath at 100°C for 30 min. The extract was centrifuged at  
95 12 000 × g for 10 min at 20°C and washed 5 times with 80 ml distilled water. The pellet was  
96 re-suspended in 8 ml phosphate buffer (20 mM, pH 7.8) containing 200 µg/ml trypsin (Sigma-  
97 Aldrich) and digested overnight at 37°C with shaking at 150 rpm. Trypsin inhibitor (200  
98 µg/ml, Sigma-Aldrich) in 8 ml phosphate buffer (20 mM, pH 7.8) was added and incubated at  
99 37°C for 30 min with shaking at 150 rpm. The suspension was centrifuged as before, the  
100 pellet was washed three times with 80 ml distilled water, PG was lyophilized overnight and  
101 stored at -80°C. No differences regarding PG purity between the two methods were noticed.

102

103 **PG isolation and purification from *E. coli* DH5α** according to Rosenthal and Dziarski  
104 (1994) (4) with some modifications. 5 ml of an *E. coli* DH5α o/n culture were inoculated in

105 100 ml M9 minimal medium and incubated at 37°C until the stationary phase was reached  
106 (OD<sub>600</sub> of ca. 1.0). The cells were harvested, washed with 4 ml 10 mM Tris/Cl pH 6.8 and  
107 centrifuged again. The pellet was re-suspended in 3 ml 10 mM Tris/Cl pH 6.8, this suspension  
108 was added drop-wise to 30 ml of 4% boiling SDS and boiled for 45 min. The suspension was  
109 pelleted at 163,000 × g (50 Ti rotor, OTD combi ultracentrifuge, Thermo Fisher Scientific  
110 GmbH) for 20 min, the pellet was re-suspended in 15 ml 2 M NaCl and shaken o/n at room  
111 temperature. Another centrifugation step (163,000 × g, 20 min) followed, the pellet was  
112 washed with 6 ml distilled water, re-suspended in 500 µl distilled water and digested with the  
113 following enzymes: 50 µg/ml RNase A (from bovine thyroid, Sigma-Aldrich), 50 µg/ml  
114 DNase from *Bacillus* 9034-90-2 (Roche Diagnostics), 200 µg/ml α-amylase from *Bacillus*  
115 9000-90-2 (Roche Diagnostics) and 200 µg/ml pronase E from *Streptomyces griseus* (Sigma-  
116 Aldrich) for 60 min at 60°C. 166 µl 32% SDS were added and the suspension was boiled for  
117 15 min, centrifuged as described above and the pellet was washed with 6 ml distilled water.  
118 This step was repeated three times. The final pellet was lyophilized and stored at -80°C.

119

120

121

122 **Supplemental References**

- 123 1. **Ho, S. N., H. D. Hunt, R. M. Horton, J. K. Pullen, and L. R. Pease.** 1989. Site-  
124 directed mutagenesis by overlap extension using the polymerase chain reaction. *Gene*  
125 **77**:51–59.
- 126 2. **Leclerc, D., and A. Asselin.** 1989. Detection of bacterial cell wall hydrolases after  
127 denaturing polyacrylamide gel electrophoresis. *Can. J. Microbiol.* **35**:749–753.
- 128 3. **Eckert, C., M. Lecerf, L. Dubost, M. Arthur, and S. Mesnage.** 2006. Functional  
129 Analysis of AtlA, the Major N-Acetylglucosaminidase of *Enterococcus faecalis*. *J.*  
130 *Bacteriol.* **188**:8513–8519.
- 131 4. **Rosenthal, R., and R. Dziarski.** 1994. Isolation of peptidoglycan and soluble  
132 peptidoglycan fragments. *Methods Enzymol.* **235**:253–285.
- 133 5. **Eichenbaum, Z., M. Federle, D. Marra, W. de Vos, O. Kuipers, M. Kleerebezem,**  
134 **and J. Scott.** 1998. Use of the lactococcal *nisA* promoter to regulate gene expression in  
135 gram-positive bacteria: comparison of induction level and promoter strength. *Appl.*  
136 *Environ. Microbiol.* **64**:2763–2769.

137

138

139 **Supplemental Tables**140 **Table S1: Oligonucleotides used**

| Primer                                                                      | Sequence (5'-3') <sup>a</sup>            | Position                 |
|-----------------------------------------------------------------------------|------------------------------------------|--------------------------|
| <b><i>traG</i> in frame deletion</b>                                        |                                          |                          |
| UPS_ <i>traG</i> _XbaI-fw                                                   | CGCTCTAGATTGCCTTACTCAACT                 | 7141-7155 <sup>b</sup>   |
| UPS_ <i>traG</i> _BamHI-re                                                  | ATAGGATCCAGCTGTTGCTCCCAT                 | 43-57 <sup>c</sup>       |
| DWS_ <i>traG</i> _BamHI-fw                                                  | CTCGGATCCGCAAGTTATGTTGA                  | 1135-1148 <sup>c</sup>   |
| DWS_ <i>traG</i> _EcoRI-rev                                                 | TATGAATTC <del>CCCGTCTGATTCTGC</del>     | 2160-2173 <sup>c</sup>   |
| <b>Screening in frame deletion</b>                                          |                                          |                          |
| delta_ <i>traG</i> _A-fw                                                    | AATGCGTTTGCTTAACCCAGG                    | 6662-6682 <sup>b</sup>   |
| delta_ <i>traG</i> _B-re                                                    | GATCCTGGACCACCTACTAC                     | 2253-2272 <sup>c</sup>   |
| delta_ <i>traG</i> _C-fw                                                    | TTCATATCATGGGAGCAACAGC                   | 35-56 <sup>c</sup>       |
| delta_ <i>traG</i> _D-re                                                    | TCCTTATTCAACATAACTTGC                    | 1135-1155 <sup>c</sup>   |
| <b><i>aacA-aphD</i> gene</b>                                                |                                          |                          |
| Gent_BglII-fw                                                               | TATAGATCTGGACCTACATGATGAATGG             | 41998-42016 <sup>d</sup> |
| Gent_BglII-rev                                                              | CTAAGATCTCTGGACTTGACTCACTTC              | 44018-44035 <sup>d</sup> |
| <b>Cloning of <i>traG</i><math>\Delta</math>tmh and <i>traG</i> domains</b> |                                          |                          |
| <i>traG</i> $\Delta$ tmh-EcoRI-fw                                           | TCCGAATTCCTAGCAACAGAA                    | 178-189 <sup>e</sup>     |
| <i>traG</i> -SalI-rev                                                       | CTCGT <del>CGACA</del> ACTCCATTTCTCCT    | 1157-1172 <sup>c</sup>   |
| <i>slt</i> -SalI-rev                                                        | CACGT <del>CGACTT</del> CTTAACCTGACATATT | 556-573 <sup>c</sup>     |
| <i>chap</i> -EcoRI-fw                                                       | TGAGAATTCGGTGGCGAAAAGGTA                 | 565-579 <sup>e</sup>     |
| <b>PCR overlap extension</b>                                                |                                          |                          |
| <i>traG</i> _E87G-fw                                                        | GCAAATTTGGATCCGGCGGTAATGGTG              | 294-319 <sup>e</sup>     |
| <i>traG</i> _E87G-rev                                                       | CGCCGGATCCAATTTGCATAAGGGCTA              | 284-310 <sup>e</sup>     |
| <b><i>traG</i> complementation</b>                                          |                                          |                          |
| <i>traG</i> _SalI-fw                                                        | GCGGT <del>CGAC</del> ATGGGAGCAACAGCT    | 43-57 <sup>c</sup>       |
| <i>traG</i> _RBS_SalI_fw                                                    | GAGGT <del>CGAC</del> ATTAGGAAGGTTGGTG   | 17-32 <sup>c</sup>       |
| <i>traG</i> _SalI-rev                                                       | GCCGT <del>CGACTT</del> TATTCAACATAACTTG | 1093-1110 <sup>c</sup>   |
| <i>traG</i> $\Delta$ tmh-SalI-fw                                            | TCCGT <del>CGAC</del> CTAGCAACAGAA       | 178-189 <sup>e</sup>     |
| <i>traG</i> -SalI-rev                                                       | CTCGT <del>CGACA</del> ACTCCATTTCTCCT    | 1157-1172 <sup>c</sup>   |

***traG*Δ*tmh* sequencing**

pEU327\_Test\_SalI\_fw            CTTGCCAGTCACGTTACG            5

pEU327\_Test\_SalI\_rev            GATCTGCGATATCCACTTC            5

---

141 <sup>a</sup> added restriction sites are shown in **bold** and exchanged nucleotides in *italics* and *underlined*.

142 <sup>b</sup> GenBank accession number L39769

143 <sup>c</sup> GenBank accession number AJ505823

144 <sup>d</sup> GenBank accession number AF051917

145

146



147 **Supplemental Figure Legends**

148

149 **Fig. S1: Purification of TraGΔTMH, SLT<sub>TraG</sub>, SLT(E87G)<sub>TraG</sub>, and CHAP<sub>TraG</sub> as MBP**  
150 **fusion proteins via affinity chromatography.** Samples were analyzed on a 12% SDS  
151 polyacrylamide gel. Samples from overexpression and the respective protein eluted from the  
152 amylose column are shown. Lane 1, molecular weight marker (Jena Bioscience, Jena,  
153 Germany): marker bands: 116 kDa, 97 kDa, 66 kDa, 38 kDa, and 28 kDa; lane 2, TraGΔTMH  
154 overexpression; lane 3, TraGΔTMH eluate (78 kDa); lane 4, SLT<sub>TraG</sub> overexpression; lane 5,  
155 SLT<sub>TraG</sub> eluate (57 kDa); lane 6, SLT(E87G)<sub>TraG</sub> overexpression; lane 7, SLT(E87G)<sub>TraG</sub> eluate  
156 (57 kDa); lane 8, CHAP<sub>TraG</sub> overexpression; lane 9, CHAP<sub>TraG</sub> eluate (64 kDa).

157
