# Supplementary material
Source: PubMed Central journal article supplement (PMC3807477)

Figure S1

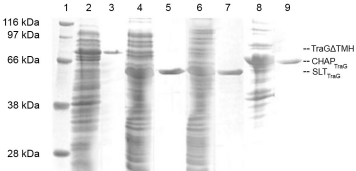

Supplement: JB.02263-12_zjb999092822so2.pdf [file JB.02263-12_zjb999092822so2.pdf]
